# Supplementary material for: Benefits and safety of transdermal glyceryl trinitrate in acute stroke: a systematic review and meta-analysis of randomised trials (protocol)
Source: HighWire-hosted journal article supplement (doi:10.1136/bmjopen-2020-043591), 2021-01-01
Supplement: bmjopen-2020-043591supp001_data_supplement.pdf [file bmjopen-2020-043591supp001_data_supplement.pdf]

## Appendix 1. Medline Search Strategy Through Pubmed Interface

### Filters:

Time period: 1<sup>st</sup> Jan 1966 to 30<sup>th</sup> June 2020

Article type: Clinical Study, Clinical Trial Phases 1 to IV, Controlled Clinical Trial, Pragmatic Clinical Trial

Species: Humans

Language restrictions: No

Age limits: 13 to 80+ years

| #   | Searches                             |
|-----|--------------------------------------|
| 1.  | Acute stroke/                        |
| 2.  | Ischaemic stroke (tw)                |
| 3.  | Haemorrhagic stroke (tw)             |
| 4.  | Intracerebral haemorrhage (tw)       |
| 5.  | Brain infarction/                    |
| 6.  | Brain haemorrhage/                   |
| 7.  | Prehospital emergency care/          |
| 8.  | 1-7 or                               |
| 9.  | Transdermal glyceryl trinitrate (tw) |
| 10. | Nitroglycerin/                       |
| 11. | Trinitroglycerin (tw)                |
| 12. | GTN (tw)                             |
| 13. | Nitric oxide donor*/                 |
| 14. | 9 -13 or                             |
| 15. | Mortality (tw)                       |
| 16. | Death (tw)                           |
| 17. | Blood pressure/                      |
| 18. | Functional outcome* (tw)             |
| 19. | Haemodynamic*/                       |
| 20. | Cerebral haemodynamic*/              |
| 21. | 15-20 or                             |
| 22. | 8 and 14 and 21                      |
