# Supplementary material for: Benefits and safety of transdermal glyceryl trinitrate in acute stroke: a systematic review and meta-analysis of randomised trials (protocol)
Source: HighWire-hosted journal article supplement (doi:10.1136/bmjopen-2020-043591), 2021-01-01
Supplement: bmjopen-2020-043591supp002_data_supplement.pdf [file bmjopen-2020-043591supp002_data_supplement.pdf]

## Appendix 2. Data Collection Form (Adapted from Cochrane Collaboration)

### General Information

|                                                              |  |
|--------------------------------------------------------------|--|
| <b>Date form completed</b>                                   |  |
| <b>Name of reviewer extracting data</b>                      |  |
| <b>Contact details of reviewer extracting data</b>           |  |
| <b>Title of publication</b>                                  |  |
| <b>Publication ID (first author and year of publication)</b> |  |
| <b>Country in which study was conducted</b>                  |  |
| <b>Study funding source</b>                                  |  |
| <b>Possible conflicts of interests for study authors</b>     |  |

### Primary Study Details

#### 1. Methods

| <b>Study Characteristics</b>                            | <b>Review Inclusion Criteria</b>                 |
|---------------------------------------------------------|--------------------------------------------------|
| <b>Design (Type of randomized trial)</b>                | Blinded vs non-blinded<br><br>Cross-over present |
| <b>Method(s) of recruitment of participants</b>         |                                                  |
| <b>Unit of allocation (individual vs cluster/group)</b> |                                                  |
| <b>Clinical setting</b>                                 | Pre-hospital vs Emergency Department vs Hospital |
| <b>Types of intervention</b>                            | Different dosing regimens of transdermal GTN     |

|                                  |                                           |
|----------------------------------|-------------------------------------------|
| <b>Types of comparator</b>       | Standard therapy vs placebo               |
| <b>Types of outcome measures</b> | Primary:<br><br>Secondary:<br><br>Safety: |

## 2. Study Population and Setting

|                                                                  |                                                                                                                                            |
|------------------------------------------------------------------|--------------------------------------------------------------------------------------------------------------------------------------------|
| <b>Study population description</b>                              | Stroke subtypes: haemorrhagic vs ischaemic<br><br>Stroke onset to randomization<br><br>Other stroke subgroups (like IV thrombolytics, etc) |
| <b>Inclusion criteria</b>                                        |                                                                                                                                            |
| <b>Exclusion criteria</b>                                        |                                                                                                                                            |
| <b>Start date</b>                                                |                                                                                                                                            |
| <b>End date</b>                                                  |                                                                                                                                            |
| <b>Duration of participation (recruitment to last follow-up)</b> |                                                                                                                                            |

## 3. Participants (in intervention vs control/placebo groups)

|                                                            |                                                    |
|------------------------------------------------------------|----------------------------------------------------|
| <b>Total number of individuals randomized</b>              | Intervention group:<br><br>Control/ placebo group: |
| <b>Total number of clusters randomized (if applicable)</b> | Intervention group:<br><br>Control/ placebo group: |
| <b>Number of withdrawals/exclusions</b>                    | Intervention group:<br><br>Control/ placebo group: |
| <b>Number of cross-overs</b>                               | Intervention group:                                |

|                                                                      |                                                |
|----------------------------------------------------------------------|------------------------------------------------|
|                                                                      | Control/ placebo group:                        |
| <b>Baseline imbalances</b>                                           |                                                |
| <b>Other treatments (apart from intervention vs control/placebo)</b> | Intervention group:<br>Control/ placebo group: |
| <b>Subgroups measured</b>                                            |                                                |
| <b>Subgroups reported</b>                                            |                                                |

#### 4. Outcomes (create a separate section for each outcome)

|                                                                                                        |  |
|--------------------------------------------------------------------------------------------------------|--|
| <b>Outcome name</b>                                                                                    |  |
| <b>Outcome type (Primary vs secondary vs safety)</b>                                                   |  |
| <b>Time points when outcome was measured (from start or at end of intervention or control/placebo)</b> |  |
| <b>Time points reported</b>                                                                            |  |
| <b>Outcome definition</b>                                                                              |  |
| <b>Method(s) of outcome assessment (using any tool/scale, etc)</b>                                     |  |
| <b>Is the outcome assessment tool validated?</b>                                                       |  |
| <b>Persons measuring and /or reporting outcome</b>                                                     |  |
| <b>Imputation of missing data</b>                                                                      |  |
| <b>Analysis via intention-to-treat or per-protocol or both</b>                                         |  |

#### 5. Results (create a separate section for each outcome)

|                |  |
|----------------|--|
| <b>Outcome</b> |  |
|----------------|--|

|                                                                          |                                                   |
|--------------------------------------------------------------------------|---------------------------------------------------|
|                                                                          |                                                   |
| <b>Dichotomous or continuous</b>                                         |                                                   |
| <b>Subgroup</b>                                                          |                                                   |
| <b>Time point</b>                                                        |                                                   |
| <b>Results<br/>(may have more than two arms)</b>                         | Intervention group:<br><br>Control/placebo group  |
| <b>Number of missing participants</b>                                    | Intervention group:<br><br>Control/placebo group: |
| <b>Number of cross-over</b>                                              | Intervention group:<br><br>Control/placebo group: |
| <b>Statistical methods used and<br/>appropriateness of these methods</b> |                                                   |

**Risk of Bias Assessment (create a separate section for each outcome)**

| <b>Domain</b>                                                                | <b>Risk of bias<br/>(High/Low/Unclear)</b> | <b>Support for Judgement</b> |
|------------------------------------------------------------------------------|--------------------------------------------|------------------------------|
| <b>Random sequence<br/>generation<br/>(selection bias)</b>                   |                                            |                              |
| <b>Allocation<br/>concealment<br/>(selection bias)</b>                       |                                            |                              |
| <b>Blinding of<br/>participants and<br/>personnel<br/>(performance bias)</b> |                                            |                              |
| <b>Blinding of outcome<br/>assessment<br/>(detection bias)</b>               |                                            |                              |
| <b>Incomplete outcome<br/>data<br/>(attrition bias)</b>                      |                                            |                              |

|                                                     |  |  |
|-----------------------------------------------------|--|--|
|                                                     |  |  |
| <b>Selective outcome reporting (reporting bias)</b> |  |  |
| <b>Other bias</b>                                   |  |  |
