# Supplementary material for: Benefits and safety of transdermal glyceryl trinitrate in acute stroke: a systematic review and meta-analysis of randomised trials (protocol)
Source: HighWire-hosted journal article supplement (doi:10.1136/bmjopen-2020-043591), 2021-01-01
Supplement: bmjopen-2020-043591supp003_data_supplement.pdf [file bmjopen-2020-043591supp003_data_supplement.pdf]

## Appendix 3. Summary of findings table

| Certainty assessment                                                                                                                     |              |              |               |              |             |                      | No of patients  |                         | Effect             |                    | Certainty | Importance |
|------------------------------------------------------------------------------------------------------------------------------------------|--------------|--------------|---------------|--------------|-------------|----------------------|-----------------|-------------------------|--------------------|--------------------|-----------|------------|
| No of studies                                                                                                                            | Study design | Risk of bias | Inconsistency | Indirectness | Imprecision | Other considerations | Transdermal GTN | Control/placebo therapy | Relative (95% CIs) | Absolute (95% CIs) |           |            |
| <b>In-hospital mortality (follow up: range 1 day to 3 months) [Primary Outcome]</b>                                                      |              |              |               |              |             |                      |                 |                         |                    |                    |           |            |
|                                                                                                                                          |              |              |               |              |             |                      |                 |                         |                    |                    |           |            |
| <b>Mean arterial pressure (follow up: range 1 day to 10 days) [Primary Outcome]</b>                                                      |              |              |               |              |             |                      |                 |                         |                    |                    |           |            |
|                                                                                                                                          |              |              |               |              |             |                      |                 |                         |                    |                    |           |            |
| <b>Modified Rankin Scale (follow up: range 3 months to 12 months) [Primary Outcome]</b>                                                  |              |              |               |              |             |                      |                 |                         |                    |                    |           |            |
|                                                                                                                                          |              |              |               |              |             |                      |                 |                         |                    |                    |           |            |
| <b>Development of intracerebral haemorrhage (follow up: range 1 day to 10 days) [Secondary Outcome]</b>                                  |              |              |               |              |             |                      |                 |                         |                    |                    |           |            |
|                                                                                                                                          |              |              |               |              |             |                      |                 |                         |                    |                    |           |            |
| <b>Deterioration of NIHSS scores by at least 4 points during hospitalization (follow up: range 1 day to 10 days) [Secondary Outcome]</b> |              |              |               |              |             |                      |                 |                         |                    |                    |           |            |
|                                                                                                                                          |              |              |               |              |             |                      |                 |                         |                    |                    |           |            |
| <b>Length of hospital stay (follow up: range 1 day to 3 months) [Secondary Outcome]</b>                                                  |              |              |               |              |             |                      |                 |                         |                    |                    |           |            |
|                                                                                                                                          |              |              |               |              |             |                      |                 |                         |                    |                    |           |            |
| <b>Number of hypotensive episodes requiring intervention* (follow up: range 1 day to 10 days) [Safety Outcome]</b>                       |              |              |               |              |             |                      |                 |                         |                    |                    |           |            |
|                                                                                                                                          |              |              |               |              |             |                      |                 |                         |                    |                    |           |            |

GTN: Glyceryl trinitrate; CIs: Confidence intervals; NIHSS: National Institutes of Health Stroke Scale

\*Interventions include discontinuing transdermal GTN, administration of intravenous fluids and/or inotropic drugs
